# Supplementary material for: Association of thiamine administration and prognosis in critically ill patients with heart failure
Source: Front Pharmacol. 2023 Mar 23;14:1162797. doi: 10.3389/fphar.2023.1162797 (PMC10076601; doi:10.3389/fphar.2023.1162797)
Supplement: Supplementary file 1 [file Table2.XLSX]

## Sheet: Sheet1
Variable	VIF
Thiamine	1.07374
Age	1.90223
Gender	1.19543
Ethnicity	1.2282
BMI	1.10857
Myocardial infarct	1.23395
Hypertension	1.51199
Diabetes	1.59903
Liver disease	1.36568
Peripheral vascular disease	1.19107
Cerebrovascular disease	1.19775
Chronic pulmonary disease	1.28502
Chronic renal disease	2.28612
Malignant cancer	1.60875
Sepsis	1.24716
Charlson comorbidity index	3.97788
GCS	3.256
SOFA	2.84027
APSⅢ	4.66932
Hematocrit	3.99912
Hemoglobin	3.88707
Platelets	1.2864
WBC	1.17765
Anion gap	4.41549
Bicarbonate	4.07029
BUN	2.13291
Calcium	1.26402
Chloride	2.51048
Creatinine	2.91446
Glucose	1.31824
Sodium	3.81194
Potassium	1.81996
PT	1.12664
NT-proBNP	1.19118
Lactate	1.43623
PH	2.16003
PaO2	1.34035
PaCO2	3.3497
SpO2	1.33317
Heart rate	1.55926
SBP	1.6668
DBP	1.98633
Respiratory rate	1.34532
Temperature	1.22752
Urine output	1.36405
ACEI	1.08746
ARB	1.70718
ICD	1.99446
Beta-blocker	1.29312
Diuretics	2.9362
RRT	1.63969
Vasopressor	1.16088
Mechanical ventilation	3.01382
